# Supplementary material for: Topographic and vegetation controls of the spatial distribution of snow depth in agro-forested environments by UAV-lidar
Source: Copernicus journal article supplement (doi:10.5194/tc-2022-124), 2022-06-23
Supplement: Supplementary file 1 [file tc-2022-124-supplement.pdf]

## Supplement

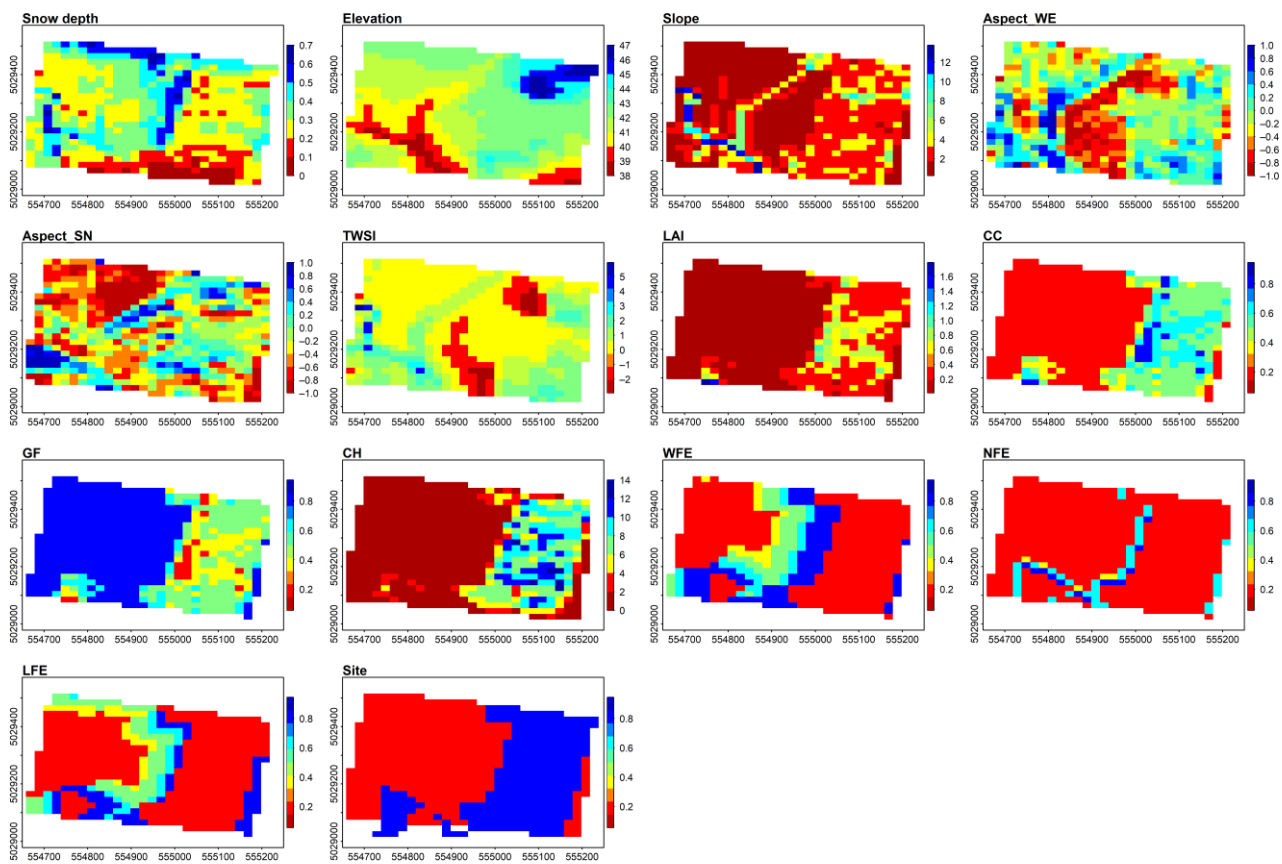

**Figure S1.** Sainte-Marthe snow depth and predictor variables maps. Elevation is presented as ellipsoidal heights.

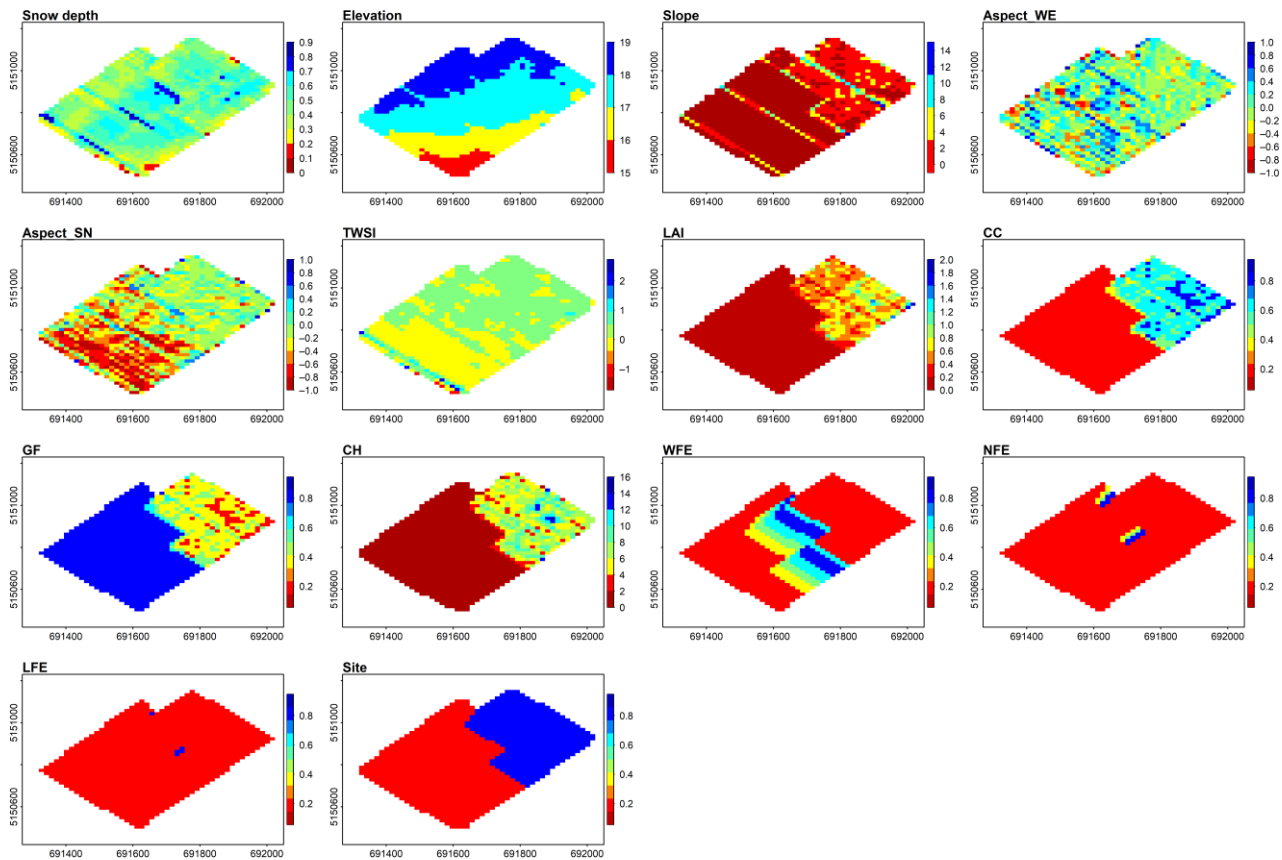

5 **Figure S2.** Saint-Maurice snow depth and predictor variables maps. Elevation is presented as ellipsoidal heights.

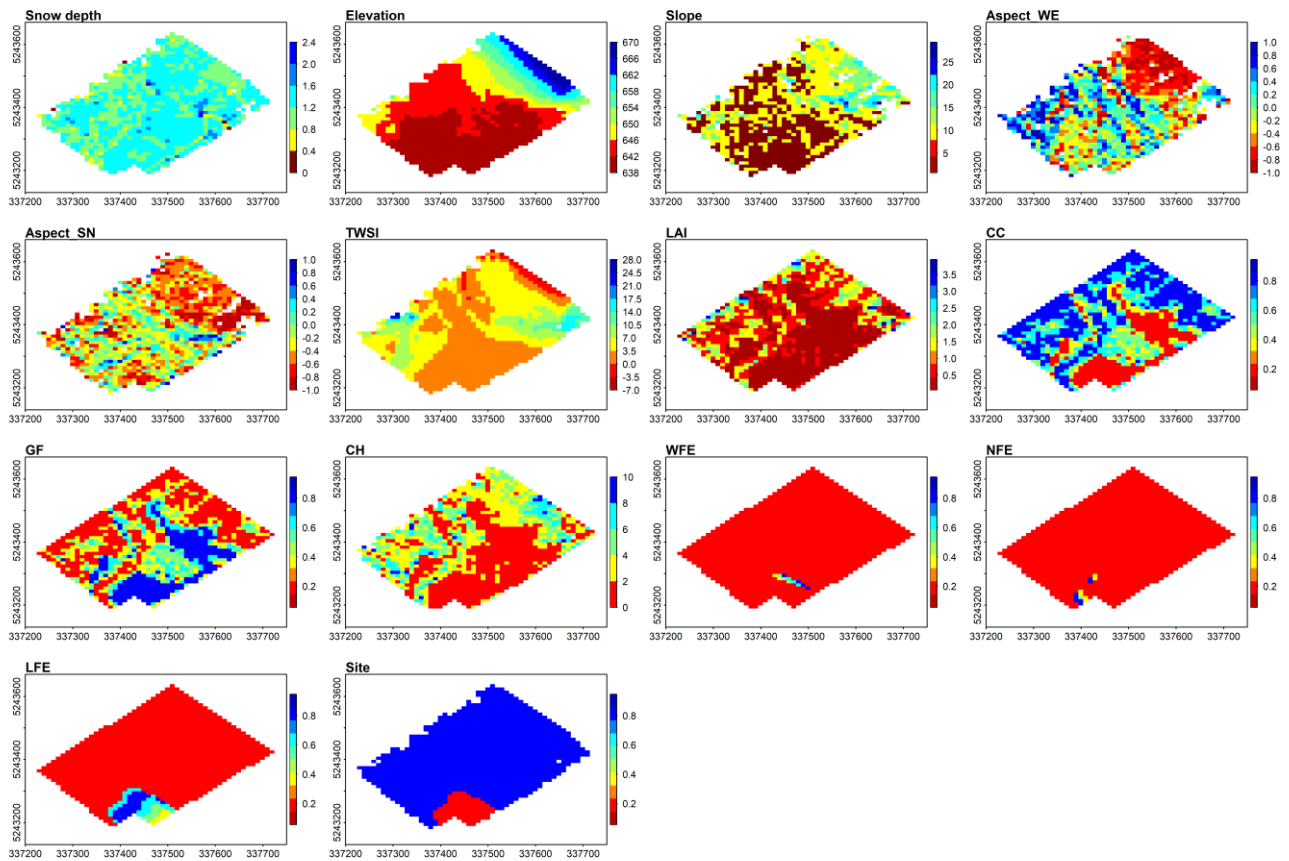

**Figure S3.** Montmorency snow depth and predictor variables maps. Elevation is presented as ellipsoidal heights.
